# Supplementary material
Source: PubMed Central journal article supplement (PMC4843809)
Supplement: NIHMS778758-supplement-Supplemental.pdf [file NIHMS778758-supplement-Supplemental.pdf]

15. Supplementary figures

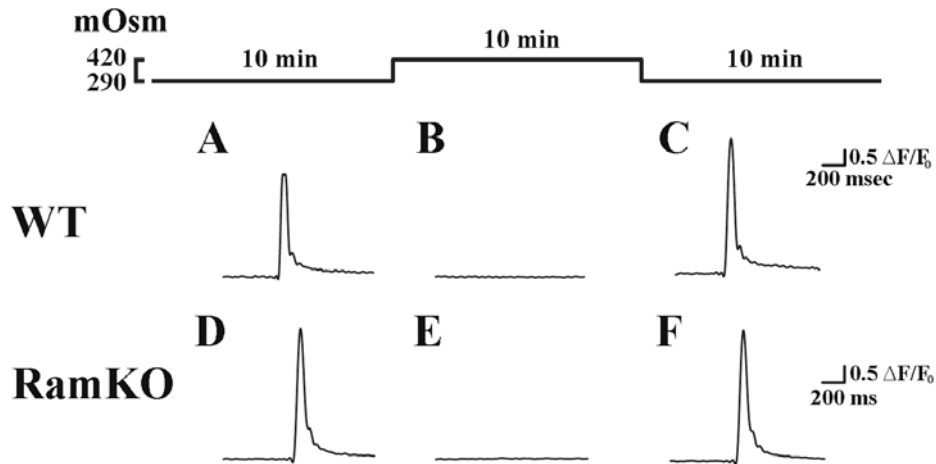

**Figure S1.** Global  $\text{Ca}^{2+}$  transients in mouse FDB fibers isolated from WT and RamKO littermates elicited before and after hyperosmotic stress-induced-ECREs. FDB fibers were loaded with Fluo4 and electrically stimulated to check their viability before, during and after application of the hypertonic solution. Panels A and D display representative traces of  $\text{Ca}^{2+}$  transient triggered by an electrical pulse (4ms, 30-40 V) in WT (panel A) and RamKO (panel B) fibers respectively. Cells lose the ability to contract after a 10 min exposure to the hyperosmotic solution (B, E). Panels C and F show that the  $\text{Ca}^{2+}$  transients recover after 10 min of washing with NR (290 mOsm).
